# Supplementary material for: Characterisation of Chrysoporthe cubensis and Chrysoporthe deuterocubensis, the Stem Canker Diseases of Eucalyptus spp. in a Forest Plantation in Malaysia
Source: MDPI journal article supplement (doi:10.3390/f14081660), 2023-08-17
Supplement: s1 [file s1]

**Supplementary Figure S1: Alignment of a region of partial ITS sequence showed single polymorphism between *Chrysoporthe cubensis* and *Chrysoporthe deuterocubensis* with the reference sequences of *Chrysoporthe cubensis* MH858337 and *Chrysoporthe deuterocubensis* MH465621 respectively. Red arrow indicated polymorphism site.**



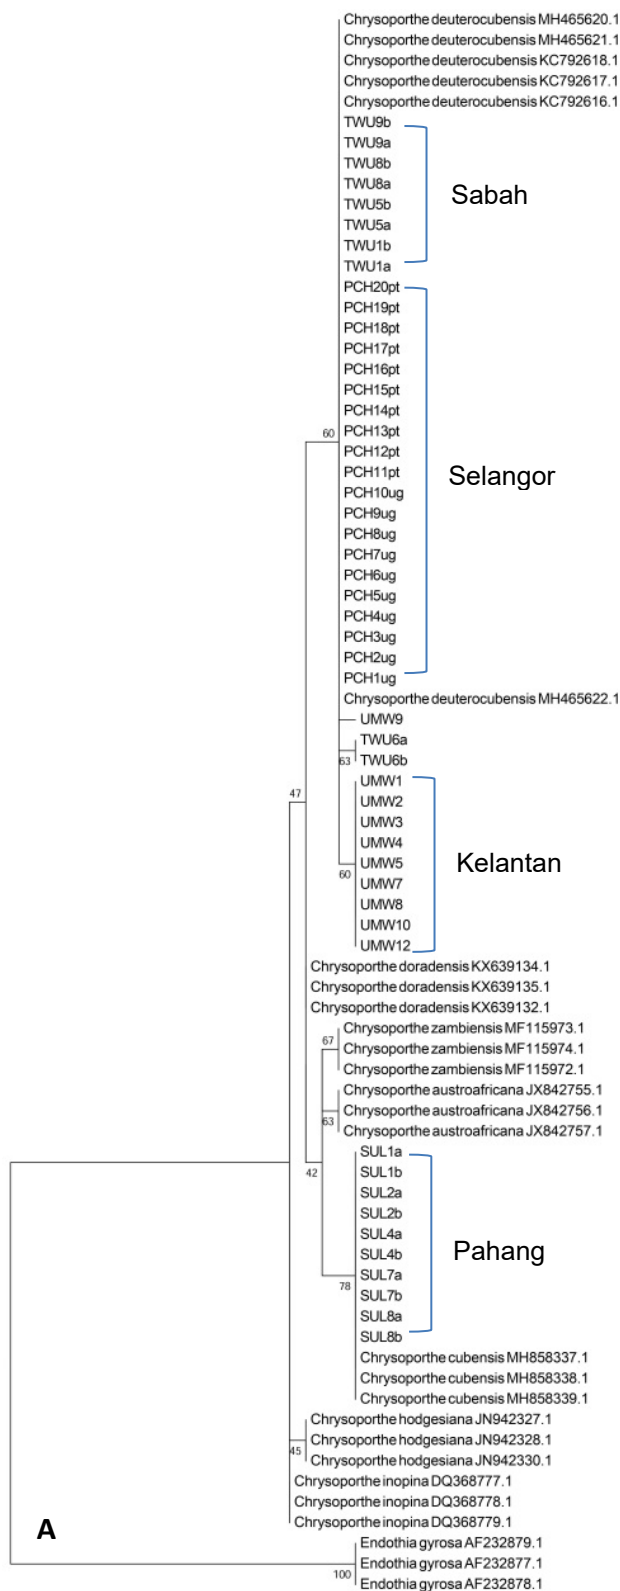

**Supplementary Figure S2 (A):** Phylogram from a maximum likelihood of six *Chrysoporthe* spp. and *Endothia gyrosa* as outgroup based on the combined ITS,  $\beta$ -tubulin 2 gene and TEF-1 $\alpha$ , UltraFast Bootstrap values and genealogical concordance factors are indicated on branch nodes. The isolates identified in this study as *Chrysoporthe cubensis* and *Chrysoporthe deuterocubensis* from Malaysia



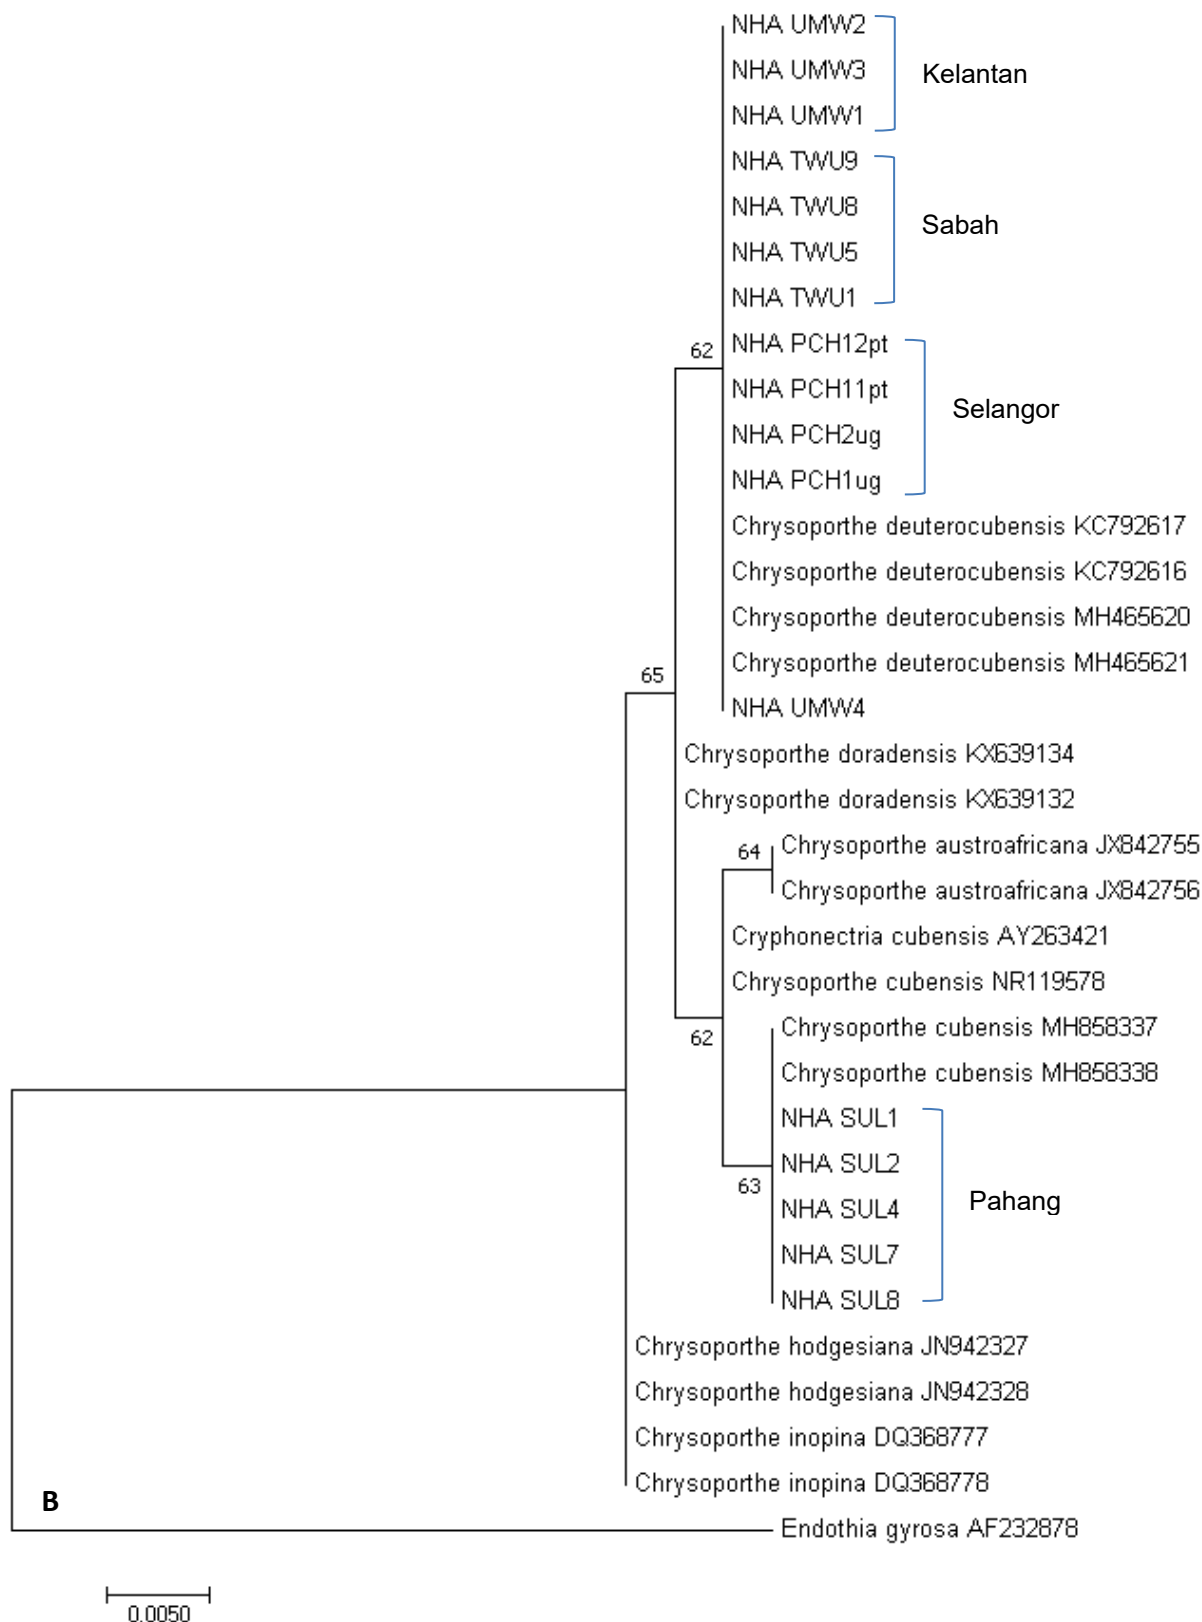

Supplementary Figure S2 (B): Phylogram from a maximum likelihood of six *Chrysoporthe* spp. and *Endothia gyrosa* as outgroup based on the ITS regions. UltraFast Bootstrap values and genealogical concordance factors are indicated on branch nodes. The isolates identified in this study as *Chrysoporthe deuterocubensis* fall within the reference *Chrysoporthe deuterocubensis* MH465621 clade and *Chrysoporthe cubensis* fall within the reference *Chrysoporthe cubensis* MH858337 clade



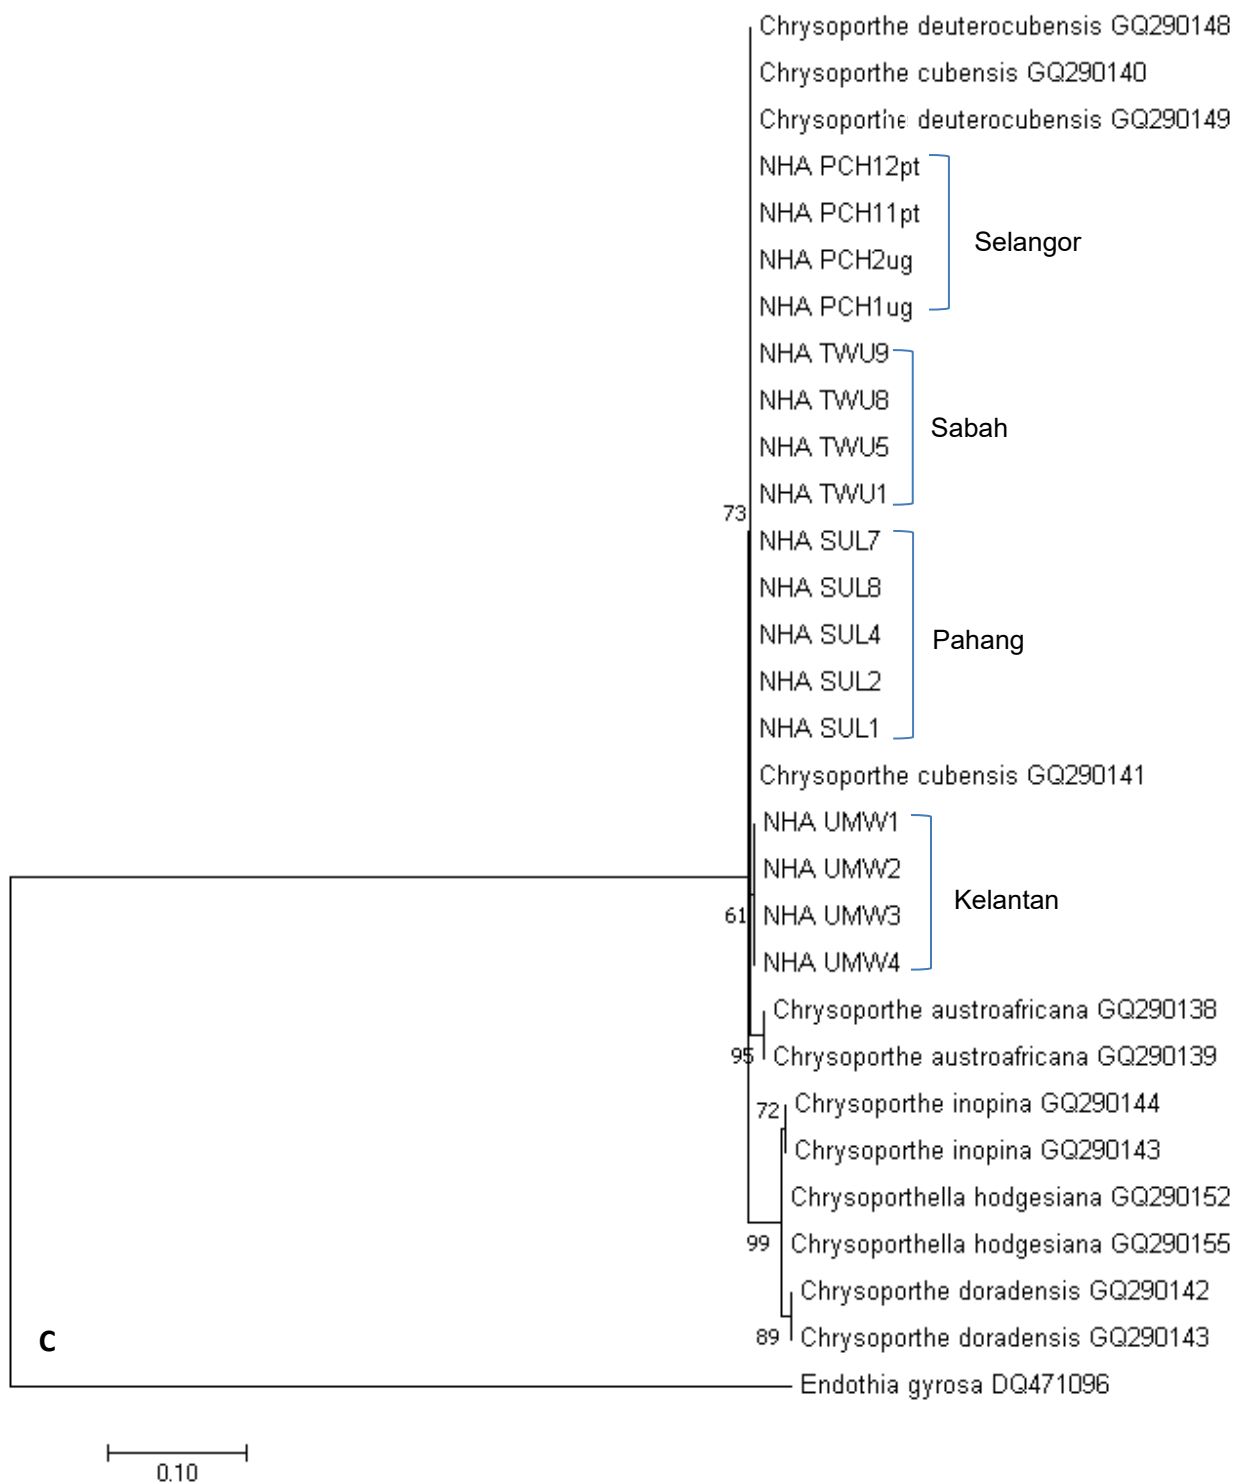

**Supplementary Figure S2 (C):** Phylogram from a maximum likelihood search of six *Chrysoporthe* spp. and *Endothia gyrosa* as outgroup based on the  $\beta$ -tubulin 2 region. UltraFast Bootstrap values and genealogical concordance factors are indicated on branch nodes. The isolates identified in this study as *Chrysoporthe deuterocubensis* fall within the reference *Chrysoporthe deuterocubensis* CQ290149 clade and *Chrysoporthe cubensis* fall within the reference *Chrysoporthe cubensis* CQ290141



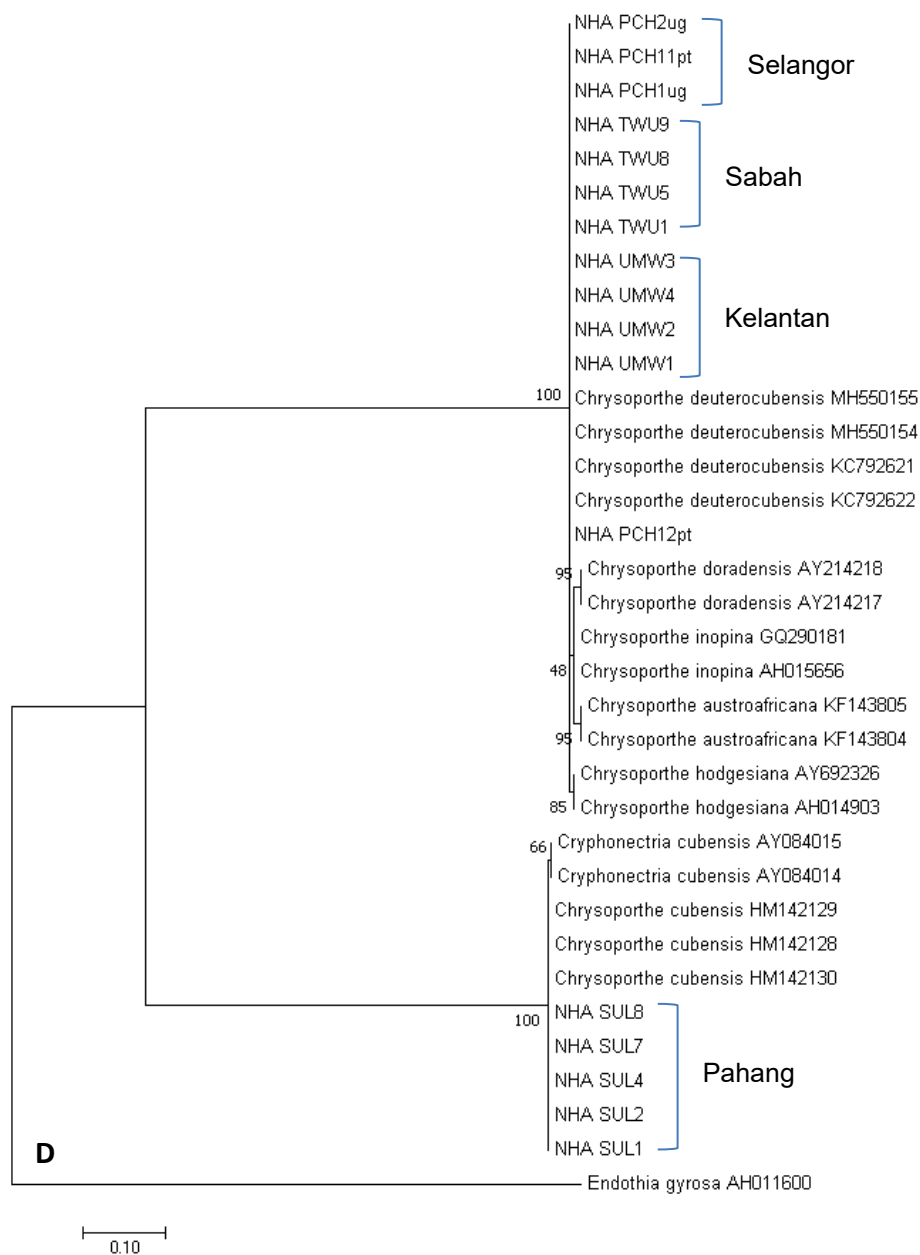

**Supplementary Figure S2 (D):** Phylogram from a maximum likelihood of six *Chrysoporthe* spp. and *Endothia gyrosa* as outgroup based on the TEF-1 $\alpha$ . UltraFast Bootstrap values and genealogical concordance factors are indicated on branch nodes. The isolates identified in this study as *Chrysoporthe deuterocubensis* fall within the reference *Chrysoporthe deuterocubensis* MH550155 clade and *Chrysoporthe cubensis* fall within the reference *Chrysoporthe cubensis* HM142130 clade



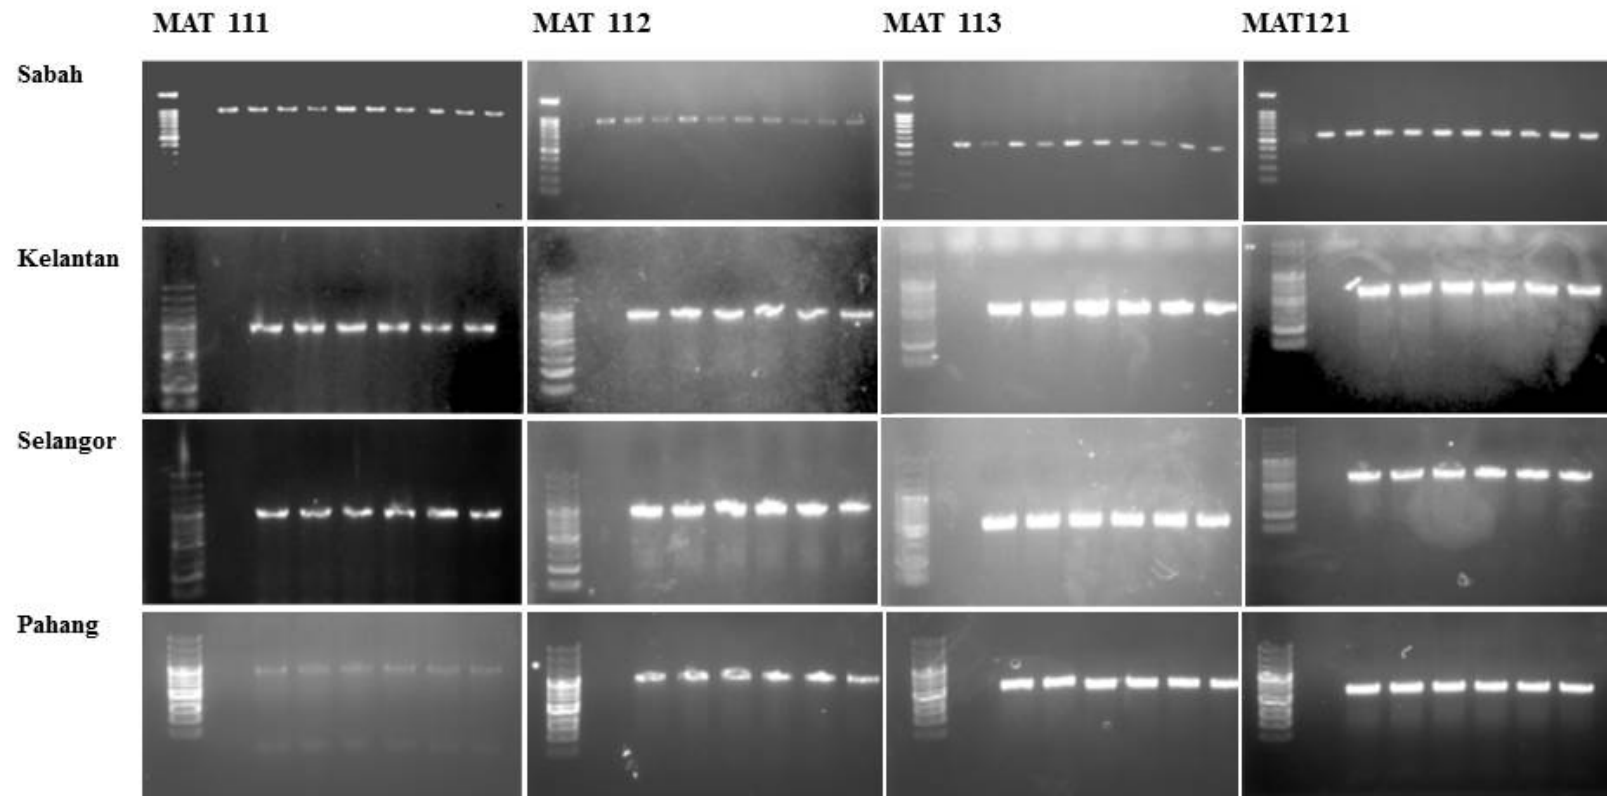

Supplementary Figure S3: Amplicon of *MAT1-1* locus genes and *MAT1-2* locus gene. a. *MAT1-1-1* 842bp, b. *MAT1-1-2* 912bp, c. *MAT1-1-3* 467bp and d. *MAT1-2-1* 536bp
