# Supplementary material for: Characterisation of Chrysoporthe cubensis and Chrysoporthe deuterocubensis, the Stem Canker Diseases of Eucalyptus spp. in a Forest Plantation in Malaysia
Source: MDPI journal article supplement (doi:10.3390/f14081660), 2023-08-17
Supplement: s1 [file s1]

Archive with 1 entries (1 files):
- forests-2359433-supplementary.pdf
